# Reference Gene Selection for Quantitative Real-Time RT-PCR Normalization in the Half-Smooth Tongue Sole (*Cynoglossus semilaevis*) at Different Developmental Stages, in Various Tissue Types and on Exposure to Chemicals

Conghui Liu<sup>1</sup>, Nian Xin<sup>1</sup>, Yi Zhai<sup>1</sup>, Liming Jiang<sup>1</sup>, Jieming Zhai<sup>2</sup>, Quanqi Zhang<sup>1</sup>, Jie Qi<sup>1\*</sup>

<sup>1</sup> Key Laboratory of Marine Genetics and Breeding, Ocean University of China, Qingdao, Shandong, China, <sup>2</sup> Laizhou Mingbo Aquatic CO., Ltd., Laizhou, Shandong, China

## Abstract

Quantitative real time RT-PCR has been described as the most sensitive method for the detection of low abundance mRNA. To date, no reference genes have been screened in the half-smooth tongue sole (*Cynoglossus semilaevis*). The aim of this study was to select the most stable genes for quantitative real-time RT-PCR. Eight housekeeping genes (18S, TUBA, B2M, ACTB, EF1A, GAPDH, RPL17 and UBCE) were tested at different developmental stages, in different tissues, and following exposure to the drug SB-431542. Using geNorm, BestKeeper and NormFinder software, GAPDH/B2M, GAPDH/18S and UBCE/GAPDH were identified as the most suitable genes from samples taken of different developmental stages while 18S/RPL17 were consistently ranked as the best reference genes for different tissue types. Furthermore, TUBA/B2M, TUBA/UBCE and B2M/TUBA were found to be the most suitable genes in samples treated with the drug, SB-431542 by geNorm, BestKeeper and NormFinder respectively. Across both different developmental stages and tissue types, the combination of 18S and GAPDH was the most stable reference gene analyzed by Ref-Finder. To test and verify the screened reference genes, the expression profiles of LEFTY-normalized to the combination of GAPDH/18S and ACTB were presented. These results will be useful for future gene-expression studies in the half-smooth tongue sole.

**Citation:** Liu C, Xin N, Zhai Y, Jiang L, Zhai J, et al. (2014) Reference Gene Selection for Quantitative Real-Time RT-PCR Normalization in the Half-Smooth Tongue Sole (*Cynoglossus semilaevis*) at Different Developmental Stages, in Various Tissue Types and on Exposure to Chemicals. PLoS ONE 9(3): e91715. doi:10.1371/journal.pone.0091715

**Editor:** Susanne Krauss-Etschmann, Ludwig-Maximilians-University Munich, Germany

**Received:** August 27, 2013; **Accepted:** February 14, 2014; **Published:** March 25, 2014

**Copyright:** © 2014 Liu et al. This is an open-access article distributed under the terms of the Creative Commons Attribution License, which permits unrestricted use, distribution, and reproduction in any medium, provided the original author and source are credited.

**Funding:** This study was financially supported by grants from the National Science Foundation of China (No. 31072204) and the National High Technology Research and Development Program of China (No. 2012AA10A401). The funders had no role in study design, data collection and analysis, decision to publish, or preparation of the manuscript.

**Competing Interests:** The authors have declared that no competing interests exist.

\* E-mail: qjije@ouc.edu.cn

## Introduction

Quantitative real-time PCR (qRT-PCR) plays an extremely important role in studies on gene expression and determination of complex molecular pathways in various biological systems [1]. It is a robust method with obvious advantages, including sensitivity, large dynamic range, and the potential for high throughput and accurate quantification [2]. The read-out can be either an absolute number of copies, or a relative amount normalized to an internal control gene [2]. The accuracy of this technique, however, might be affected at multiple stages throughout the experimental process and by several factors. It has been proposed that housekeeping genes might be used as reference genes for normalizing the results of qRT-PCR because of their consistent expression, both with respect to different developmental stages and exposure to different environmental factors. In reality, however, no single reference gene can be used for longitudinal studies for different tissues, ontogenetic stages and experimental conditions. The transcript levels of genes deemed as housekeeping traditionally may also vary considerably [3]. Thus, the optimal genes can only be confirmed with an analysis of models based on particular cases. An accepted

method used to reduce errors to a minimum is to normalize the target gene to a set of reference genes identified through an analysis of parameter models [1,4]. GeNorm, BestKeeper and NormFinder are Visual Basic Applications that were developed for running in Microsoft Excel and they are widely used in various conditional experiments [4]. Pairwise variation is calculated by geNorm to determine the most stable reference genes, whereas BestKeeper is used to evaluate the coefficient of variation. NormFinder takes the analysis of intra- and inter-group variations for normalization into consideration.

The half-smooth tongue sole (*Cynoglossus semilaevis*) is an important farmed marine fish, which shows behavioral and morphological left-right asymmetry, with one eye migrating to the opposite side (metamorphosis) during the larval stages [5]. A high larval mortality due to starvation can occur during metamorphosis when body malformations cause the mouth to fail to close. Whereas the mechanism regulating this external asymmetry remains largely unknown, evidence suggests that the Nodal signaling pathway is involved in the eye laterality of a flatfish similar to the sole, the Japanese flounder [6–9]. More studies are needed to analyze the expression profiles of genes

related to the Nodal signaling pathway. Currently, little work has been conducted on the selection of reference genes in the half-smooth tongue sole, although some reference genes have been identified in the Atlantic halibut and Japanese flounder [10–12]. While it is useful to consider the reference genes identified from the halibut and flounder, inter-species variation can occur and so it is more accurate to identify the particular genes for the species under investigation, in this case the half-smooth tongue sole [13].

The aim of this work was to screen optimal sets of reference genes for 18 different developmental stages, 8 tissue types and following treatment with SB-431542, an inhibitor of the Nodal signaling pathway. Three statistical algorithms, geNorm, Best-Keeper and NormFinder, were used to analyze the qRT-PCR data. In addition, the ontogenesis expression profiles of LEFTY were investigated to confirm the efficacy of the selected reference genes as this is reported to be part of the Nodal-pathway that plays a role in controlling eye laterality in the flounder [7], as well as being shown to be expressed on the left side of the dorsal diencephalon and internal organs to form fixed laterality [6,8]. The results obtained in this study provide an essential tool for future gene expression studies in the half-smooth tongue sole.

## Materials and Methods

### Ethics Statement

The half-smooth tongue sole used in this study were collected from local aquatic farms under a permit from the local government of Yantai, Shandong, China. All handling of the half-smooth tongue sole was conducted in accordance with the guidelines and regulations established by the Ocean University of China and the local government of YanTai.

### Fish Rearing and Sample Collection

Fertilized eggs were obtained by artificial fertilization and then maintained at 22°C. The developmental stages were determined by observation via microscopy. A total of 18 developmental stages were selected: 1-cell (0.5 hours post fertilization; hpf), 4-cell (1.5 hpf), 8-cell (1.8 hpf), 16-cell (2.3 hpf), 32-cell (2.8 hpf), 1k-cell (6 hpf) and sphere (11 hpf) stages, as well as 30% epiboly (13.5 hpf), and the 2-somite (20 hpf), 15-somite (3.5 hpf), 21-somite (27.5 hpf), 27-somite (30 hpf) and metamorphosis stages D, E, F, G, H, and I, as described by Minami (1982) [14]. In brief, the metamorphosis stages can be described as follows: Stage D (the stage prior to the start of eye migration, 15 DAH; day after hatching); Stage E (the eye begins to migrate, 17 DAH); Stage F (the migrating eye is visible from the ocular side, 18 DAH); Stage G (the upper edge of the migrating eye is beyond the dorsal margin, 19 DAH); Stage H (the upper edge of the migrating eye is beyond the dorsal mid-line, 20 DAH); Stage I (the entire migrating eye is past the dorsal mid-line, 22 DAH) (Minami, 1982). The larvae were raised at 22°C.

These 18 stages were arranged into 3 groups each containing 6 stages, called developmental stage I (from the 1-cell to 1k-cell stage), II (sphere stage to 27-somite stage) and III (metamorphosis stages D-I). For developmental stages I and II, 30 embryos were used per stage, while for developmental stage III, three larvae were used. In chemical treated experiments, embryos were treated from the 16-cell stage to the 21-somite stage with SB-431542 at 100  $\mu$ M and 200  $\mu$ M (or with double-distilled water or DMSO as controls) with 30 embryos being treated per experimental group. All experiments were performed in biological triplicate.

Regarding the different tissues, a total of six adult fish (i.e., three female and three male fish) were involved in this investigation. Eggs and sperm came from three female and three male fish,

respectively, while the other tissues (muscle, kidney, gill, spleen, liver, intestines, egg and sperm) were selected from 3 different adult fish randomly, and again experiments were performed in triplicate, and then stored in liquid nitrogen immediately until use. All procedures complied with the Institutional Animal Care and Use Committee of Ocean University of China and were specifically approved for this study.

### Selection of Reference Genes

A total of eight candidate genes were selected for the gene expression stability analysis as follows: 18S (Ribosomal RNA), TUBA ( $\alpha$ -Tubulin), ACTB ( $\beta$ -actin), B2M ( $\beta$ -2-Microglobulin), EF1A (Elongation factor-1 $\alpha$ ), GAPDH (Glyceraldehyde-3-phosphate), RPL17 (Ribosomal protein L17) and UBCE (Ubiquitin-conjugating enzyme). Moreover, LEFTY (Fw: 5'-CCCAAGGTGTTGTCCGTCTG-3'; Rev: 5'-ATT-CAAGGCTGATCCCC ATTC-3') was used to verify the proper reference genes. All the genes were identified from an unpublished cDNA library of *Cynoglossus semilaevis*. The primers were designed with Primer Premier 5.0 software (PREMIER Biosoft International, Palo Alto, CA). The full gene name, function, primers and PCR parameters are shown in Table I. The length of PCR products ranged from 70 to 170 bps, and the mean melting temperature of the forward and reverse primers ranged between 61.0°C and 62.7°C.

### RNA Extraction, cDNA Synthesis and RT-PCR

Total RNA was extracted from samples using Trizol reagent according to the manufacturer's instructions. The concentration and purity of the total RNA extracted were determined using a Nano Photometer. The absorbance ratio of each sample at OD 260/280 was between 1.9 and 2.0, and the OD 260/230 was approximately 2.0. The integrity of total RNA was assessed via 1% ethidium bromide agarose gel electrophoresis. A total of 1  $\mu$ g RNA from each sample was reverse transcribed according to the instructions of the PrimeScript<sup>TM</sup> RT reagent kit with gDNA Eraser (Takara, Japan), and the final volume was 20  $\mu$ l. Standard RT-PCR was carried out using Premix Ex Taq to characterize all the primer pairs according to the length and specificity of the products.

### Quantitative Real-time PCR (qRT-PCR)

Each 20  $\mu$ l reaction volume contained 10  $\mu$ l 2X SYBR Premix Ex Taq<sup>TM</sup>, 0.4  $\mu$ l ROX Reference Dye II, 0.4  $\mu$ l of each primer (10  $\mu$ M), 2  $\mu$ l 10X diluted cDNA template (1000X diluted cDNA for 18S rRNA) and 6.8  $\mu$ l nuclease-free water. The PCR conditions were as follows: 95°C for 30s followed by 40 cycles of 95°C for 5s and then 60°C for 40s. PCR was performed using an Applied Biosystems 7500 Real-Time PCR system. Three technical replicates were performed for each sample.

### Data Analysis

To comprehensively and systematically assess the expression variation of the candidate reference genes, all the samples were divided into three broad categories: developmental stages, different tissues, and chemical treatment. The developmental stages were subdivided into three groups: Stage I, the 1-cell stage (i.e., a newly fertilized egg) to the sphere stage; Stage II, 30% epiboly to the 27-somite stage; and Stage III, throughout metamorphosis.

The time sequence fluorescence values (R<sub>n</sub>) were collected using the qRT-PCR machine. All raw data, which based on all cDNAs samples of tissue, developmental stage, and chemical-treated, were

**Table 1.** Reference genes for gene expression normalization in *Cynoglossus semilaevis*.

| Gene symbol | Molecular function                          | Primer (5'-3')                                            | Product size (bp) | E    | R <sup>2</sup> | Average T <sub>m</sub> (°C) |
|-------------|---------------------------------------------|-----------------------------------------------------------|-------------------|------|----------------|-----------------------------|
| 18S         | Ribosomal subunit                           | Fw: GGTAACGGGGGAATCAGGGT<br>Rv: TGCCTTCCTGGATGTGGT        | 70                | 0.98 | 0.989          | 61.2                        |
| TUBA        | Cytoskeletal protein, microtubule activity  | Fw: ATCCTCCTGCTGTTGCCTTTG<br>Rv: TGACCTGATGTCGTATCGCCTC   | 107               | 0.99 | 0.990          | 62.0                        |
| ACTB        | Cytoskeletal structural protein             | Fw: GAAATCGCCGCACTTGTGT<br>Rv: GGGTCAGGATACCTCTCTTGCTCT   | 111               | 1.00 | 0.987          | 61.6                        |
| B2M         | Subunit of the MHC class I molecule         | Fw: TGTTCTGCTGTTGCCGTGT<br>Rv: TCAGGGTGTGGGCTTGTGT        | 112               | 0.97 | 0.990          | 62.2                        |
| EF1A        | Protein synthesis                           | Fw: AGGCTGGTATCTCCAAGAACGG<br>Rv: TCTGGCTGTAAGGGGGCTCA    | 122               | 0.98 | 0.987          | 62.5                        |
| GAPDH       | Glycolytic enzyme phosphorylating activity  | Fw: GAAGGGCATTCTGGGATACACT<br>Rv: TCAAAGATGGAGGAGCGGC     | 119               | 1.03 | 0.993          | 61.0                        |
| RPL17       | Structural constituent of ribosomal subunit | Fw: AGTGCCTCCCGTCCGTC<br>Rv: TCAGCGTTGCTCTGCGTT           | 114               | 1.00 | 0.991          | 61.5                        |
| UBCE        | Ligase activity, protein degradation        | Fw: GCAATGGTAGCATCTGCCTCG<br>Rv: GCTTCTCGTTATACTCTGTCGGTC | 170               | 1.00 | 0.989          | 62.7                        |

Note: E means reaction efficiencies and R<sup>2</sup> means Pearson's coefficients of determination. Average T<sub>m</sub> represents the mean melting temperature of the forward (Fw) and reverse (Rv) primers. Each sample contains 3 biological replicates.  
doi:10.1371/journal.pone.0091715.t001

imported into the PCR Miner software to calculate efficiency (E), cycle threshold (Ct), and Pearson's coefficients of determination (R<sup>2</sup>) of each reference gene. The expression stability level was determined with geNorm and NormFinder, which use relative expression values as input data by transformed the Ct values to linear scale expression quantities using the 2<sup>-delta-Ct</sup> method, and BestKeeper based on the raw Ct value directly using the comparative ΔCT method.

The overall final ranking of reference genes across all developmental stages and tissue types was calculated using RefFinder, which integrates the current major computational programs (geNorm, Normfinder, BestKeeper, and the comparative delta Ct method) to compare and rank the stability of candidate reference genes with the geometric mean of individual gene appropriate weight [15].

## Results

### Expression Profiles of Candidate Reference Genes

Eight candidate reference genes, including 18S, TUBA, B2M, ACTB, EF1A, GAPDH, RPL17 and UBCE, were selected for the evaluation of expression stability with n = 3 experiments containing 30 samples per experiment for developmental stages I and II, and 3 samples per experiment for developmental stage III, as described in the Materials and Methods. The amplification specificity of the primers used in the qRT-PCR was evaluated using agarose gel electrophoresis followed by ethidium bromide (EB) staining. The specificity of the primers producing single amplicons was confirmed by the absence of primer dimers and false priming. Specific PCR products of identical length were identified via electrophoresis (Figure 1) and sequencing results. RT-PCR data analysis showed that the amplification efficiency (E) of the eight reference genes ranged from 0.97 for B2M to 1.03 for GAPDH, the mean coefficient variation (R<sup>2</sup>) ranged from 0.9877

for B2M to 0.9938 for GAPDH, and the mean melting temperature (T<sub>m</sub>) of the forward and reverse primers ranged from 61.0°C for GAPDH to 62.7°C for UBCE (Table 1).

Throughout all developmental stages (Figure 2A), the genes with the lowest global variability were GAPDH and B2M. GAPDH, ACTB and B2M were the top three genes with the lowest variation in developmental stage I (Figure 2B); 18S, GAPDH and B2M showed little variation in stage II (Figure 2C and Figure A in File S1) and stage III (Figure 2D and Figure B in File S1). However, 18S, RPL17 and EF1A showed smaller variations in different tissues (Figure 2E and Figure C in File S1), and TUBA, B2M and UBCE were the least variable genes in the chemically treated group (Figure 2F and Figure D in File S1).

To assess the Ct value of eight candidate reference genes, we divided the raw expression levels of the genes into three parts according to the average Ct values: (1) Genes with a high transcript abundance exhibited an average Ct value below 20; (2) those with median transcript abundance had an average Ct value of 20–25; while (3) those with low transcript abundance had an average Ct value of 25–35. EF1A showed high transcript abundance in all groups except in stage I (all Ct values of eight reference genes were great than 20 in stage I); 18S showed median transcript abundance, while B2M, GAPDH showed low transcript abundance in all sample pools (Table S1). The expression level variations of the eight candidate genes indicated that optimized reference genes could be identified in each group for different research purposes.

### geNorm Analysis

The geNorm analysis was used to select the best reference genes. Two parameters were considered to quantify reference gene stability: M value (average expression stability) and V<sub>n/n+1</sub> (pairwise variation). Originally, M ≤ 1.5 and V<sub>n/n+1</sub> < 0.15 are regarded as acceptable levels of expression variability [4].

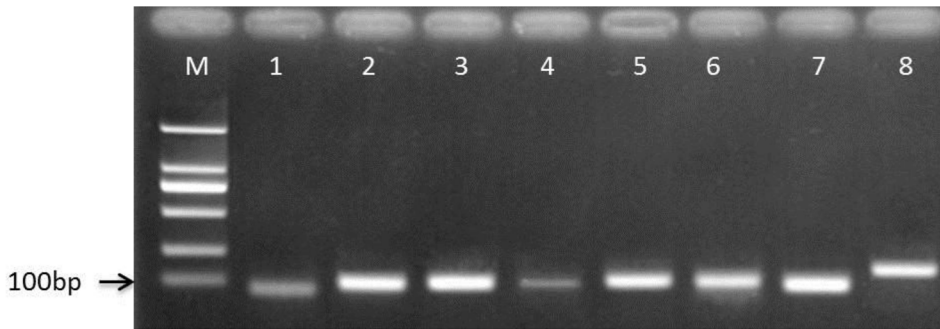

**Figure 1. Specificity of qRT-PCR and amplicon length.** Amplified fragments shown on 1% agarose gel electrophoresis with ethidium bromide staining. An identical length of specific PCR products was demonstrated. M: Marker DL2000; Lanes 1–8:18S, TUBA, B2M, ACTB, EF1A, GAPDH, RPL17 and UBCE, respectively.

doi:10.1371/journal.pone.0091715.g001

Recently, an M value below the threshold of 0.5 is generally regarded as being typical for a stable reference gene in a relatively homogeneous sample panel. For more heterogeneous panels, the mean M value may increase to 1 [16]. Depending on the developmental stage, tissue type and chemical treatment, the housekeeping gene expression stability showed some variation. Throughout all developmental stages, the most stable genes were GAPDH and B2M. The M value obtained for these two genes was 0.57, which is below the default limit of  $M \leq 1$ . 18S was also identified as stable, with an M value of 0.66 (Figure 3A). The two most stable genes in developmental stage I were 18S and UBCE (Figure 3B), GAPDH and B2M in stage II (Figure 3C); GAPDH and ACTB in stage III (metamorphic stages) (Figure 3D), 18S and RPL17 for different tissues (Figure 3E) and B2M and TUBA for the chemical treatment group (Figure 3F). To determine the number of required reference genes for each group, the  $V_n/n+1$  was evaluated using geNorm. All  $V_n/n+1$  values, including  $V_2/3$ , were below 0.15 in each pool (Figure 3G), which indicated that only two genes are needed as an internal control.

### BestKeeper Analysis

Gene expression variation was calculated for all eight candidate reference genes based on Ct-values and displayed as the standard deviation (SD) and coefficient of variance (CV) by BestKeeper. The lowest values of SD (i.e., usually  $<1$ ) indicated the highest stability [17]. BestKeeper highlighted GAPDH as the reference gene with the least overall variation from the list of eight candidate genes, with an SD of 0.29, CV value = 0.92 throughout all developmental stages (Figure 4A). The variation in expression of the other candidate reference genes was greater except the 18S and B2M (SD = 0.37, and SD = 0.38 respectively). The order of the candidate reference genes from most stable (lowest SD) to least stable (highest SD) was GAPDH > 18S > B2M > UBCE > EF1A > ACTB > TUBA > RPL17. Following for stage I, the ranking was GAPDH > B2M > ACTB > 18S > UBCE > EF1A > RPL17 > TUBA (Figure 4B); 18S > GAPDH > B2M > TUBA > EF1A > UBCE > RPL17 > ACTB for stage II (Figure 4C); and 18S > GAPDH > UBCE > B2M > ACTB > EF1A > TUBA > RPL17 for metamorphic stage III (Figure 4D). For different tissue types, the decreasing order of stability was 18S > RPL17 > EF1A > GAPDH > ACTB > TUBA > UBCE > B2M (Figure 4E). 18S (SD = 0.45, CV = 1.86) showed constant expression stability (Table S2); The order of variation changed to UBCE > TUBA > RPL17 > B2M > EF1A > 18S > ACTB > GAPDH in the chemically treated group (Figure 4F). The most stable gene was UBCE (SD = 0.26,

CV = 1.02) (Table S2), and the top five genes had similar stability levels, with SD values ranging from 0.26 to 0.4.

### NormFinder Analysis

NormFinder was applied to validate the most stable expression gene [18]. As shown in Table 2, a high M value represents a high expression variance. Thus, UBCE, GAPDH and 18S occupied the top 3 positions for the most stable expression genes in the group throughout developmental stages I, II and III. The most suitable combination of genes was UBCE and GAPDH (combined stability value = 0.632). The rest were ranked as follows: TUBA, B2M, EF1A, RPL17 and ACTB. Based on developmental stages, the ranking was 18S > GAPDH > UBCE > EF1A > ACTB > RPL17 > B2M > TUBA for stage I. The most suitable combination of genes was 18S and GAPDH (combined stability value = 0.154); GAPDH > EF1A > 18S > B2M > UBCE > TUBA > RPL17 > ACTB for stage II. The most suitable combination of genes was GAPDH and EF1A (combined stability value = 0.203); and GAPDH > 18S > B2M > ACTB > UBCE > TUBA > RPL17 > EF1A for stage III. The most suitable combination of genes was GAPDH and 18S (combined stability value = 0.038). For different tissue types, the sequence of stability was RPL17 > 18S > EF1A > ACTB > GAPDH > TUBA > UBCE > B2M. The most stable combination of genes was RPL17 and 18S (combined stability value = 0.264). The ranking order of stability changed to B2M > TUBA > EF1A > UBCE > 18S > RPL17 > GAPDH > ACTB in the chemically-treated group. The most stable combination of genes were B2M and TUBA with the combined stability value = 0.039.

According to the comprehensive ranking of the Ref-Finder performed, the combination of 18S and GAPDH with geomean 1.19 and 1.73 were confirmed as the most stable genes other than EF1A (2.62), RPL17 (4.76), UBCE (5.23), B2M (5.66), TUBA (5.73) and ACTB (7.74) across all developmental stages and tissue types.

### Expression Profile of LEFTY Gene of Ontogenesis and Drug Treatment

To test and verify the results of the reference gene screening, which were analyzed by geNorm, Bestkeeper and NormFinder, expression profiling of LEFTY was carried out via qRT-PCR. Four parameters, GAPDH, 18S, a normalization factor based on the geometric average of both Ct values (GAPDH and 18S) and ACTB were used to normalize the LEFTY qRT-PCR data. They showed a similar tendency during the continuous development process: a low and stable level from fertilization to the 32-cell stage, after which the level increased more or less consistently from

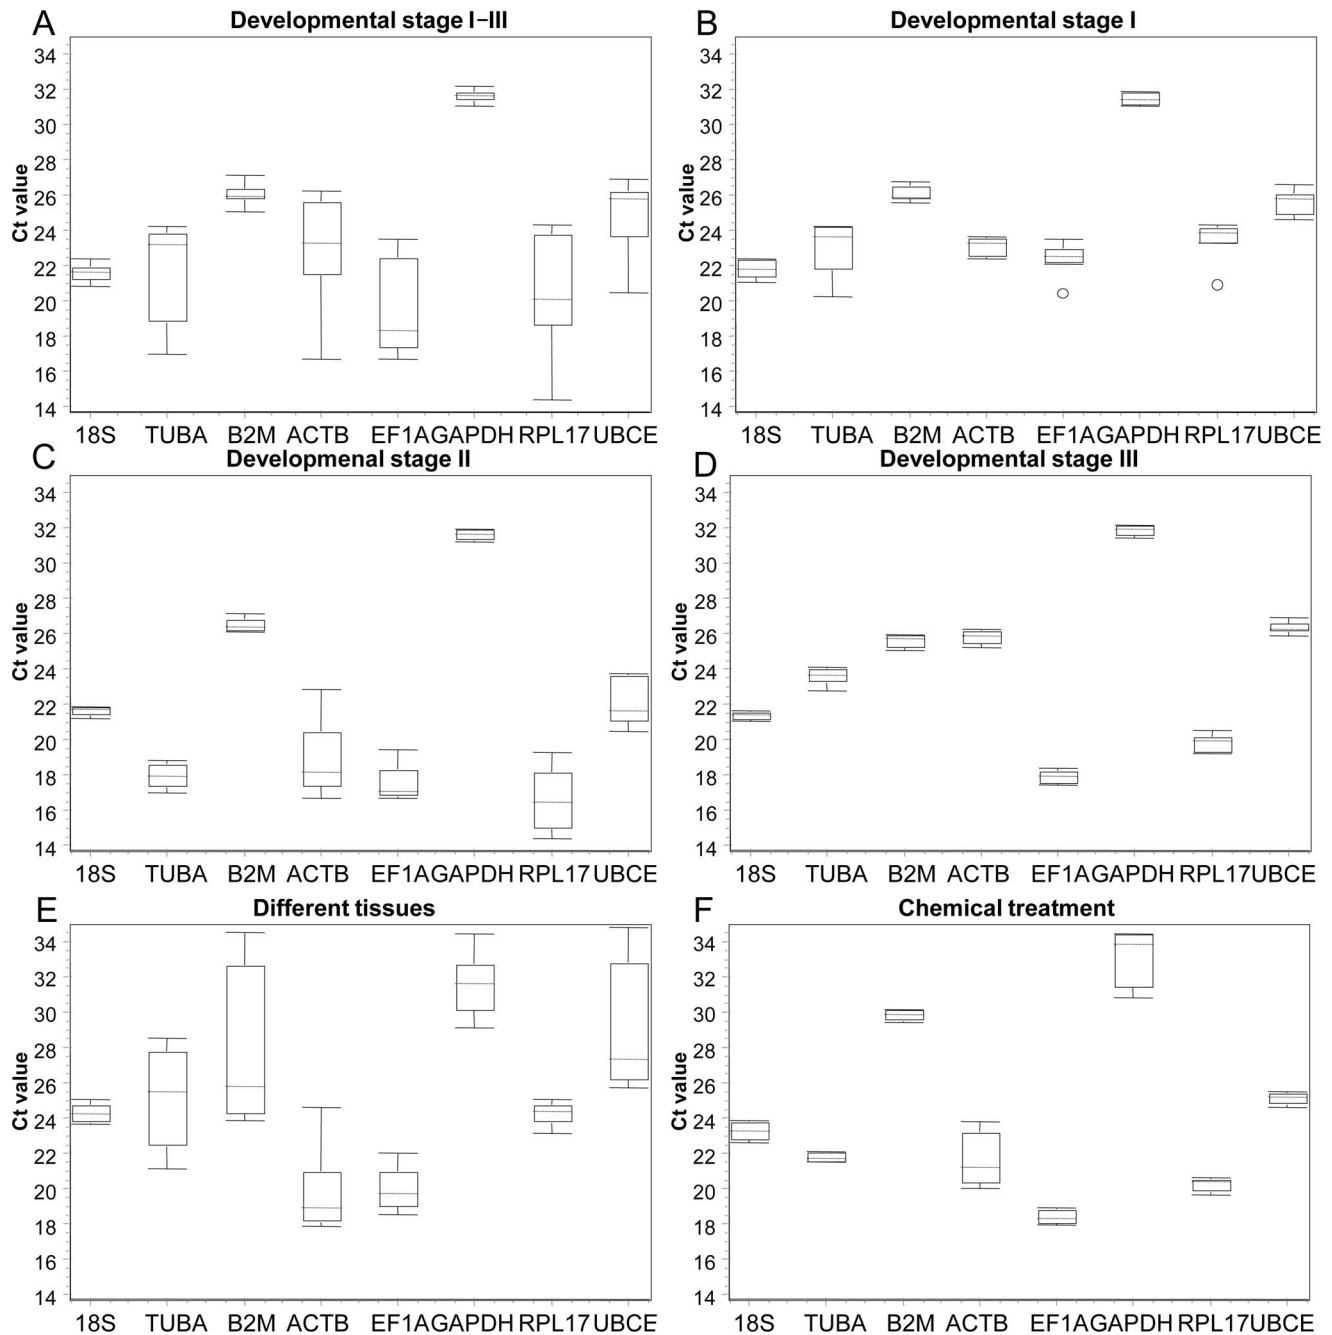

**Figure 2. The relative level of mRNA expression of the eight candidate reference genes.** The data are presented as mean cycle threshold (Ct) values and shown as box-whisker plots. The boxes represent the inter quartile range of the mean Ct values, while the bars represent the maximum and minimum Ct values. The dotted line represents the mid-hinge and the scattered points represent the abnormal data. (A) Developmental stages I – III; (B) developmental stage I; (C) developmental stage II; (D) metamorphosis stage III; (E) different tissues; (F) chemical treatment.

doi:10.1371/journal.pone.0091715.g002

high stage, to peak at the 21-somite stage, followed by a reduction in expression from the 27-somite stage to approximately 1 day after hatching, after which low-to-negligible levels were observed during the metamorphosis stages. However, the expression level identified by the combination of GAPDH and 18S was more reliable when gene expression showed different trends between single reference gene group and the combination group. For example, LEFTY gene expression showed no significant decrease from 21 somites to 27 somites labeled by GAPDH, but it

significantly dropped by the combination of GAPDH and 18S. The expression result revealed by the combination group was more consistent with the report in Japanese flounder. In addition, the expression level of LEFTY was lower compared with GAPDH/18S, and either GAPDH or 18S when ACTB was as reference gene through the entirely developmental stages. For instance, at 21 somites stage, no significant expression difference of LEFTY was shown among GAPDH, 18S and GAPDH/18S

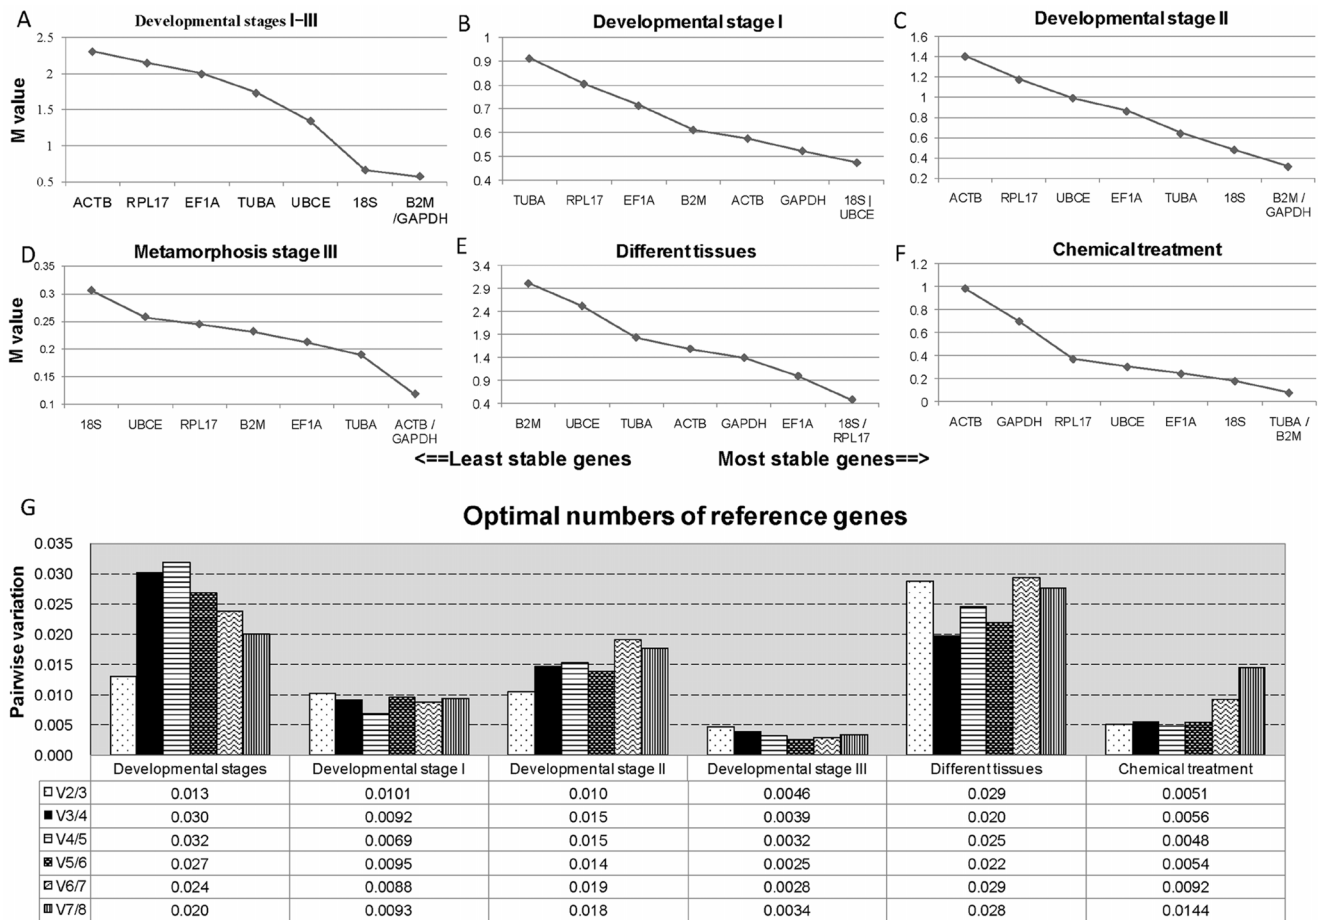

**Figure 3. Expression stability (M) analysis and the optimal reference gene number determination with geNorm.** The stability values of the eight candidate genes at: (A) Developmental stages I-III; (B) developmental stage I; (C) developmental stage II; (D) metamorphosis stage III; (E) different tissues; (F) chemical treatment; (G) The optimal number of reference genes determined with geNorm, whereby  $V_n$  was calculated from leastwise 2 genes.  $V_n/n+1$  present the pairwise variation between 2 sequential  $V_n$  and  $V_{n+1}$ . doi:10.1371/journal.pone.0091715.g003

groups with high transcript abundance, but significantly lower expression was found when ACTB as reference gene (Figure 5).

## Discussion

The qRT-PCR method is widely used in gene expression studies of both freshwater [19–21] and marine fish [22,23], when investigating a variety of conditions, such as infection [24,25] and stress [20,26–28], as well as in various cell lines [29–31] and different tissues [21–23,32]. As a crucial step, the qRT-PCR data should be accurately normalized by use of the appropriate reference genes. Otherwise, the use of non-validated reference genes can lead to erroneous conclusions that are biologically meaningless [33]. However, there is no universally applicable reference gene. The same reference genes in different species and different reference genes in the same species can have dramatically different expression levels under diverse experimental conditions. For example, GAPDH has been validated as the most stable reference gene in the mandarin fish [34], but has significant expression variation in the Atlantic halibut [33] and zebrafish [35]. On the other hand, ACTB and Tubb2 showed less expression variation, but 18S rRNA and GAPDH varied significantly, even these reference genes in the same species, Atlantic halibut [36]. Thus, to improve the sensitivity and reliability of qRT-PCR in

practice, the validation of reference genes should be performed for each different species, tissue type and experiment condition to be used.

The results obtained in our study were analyzed with geNorm, BestKeeper and NormFinder. The most stable reference genes generated from these three software applications showed a high level of similarity; however there were subtle deviations in the rank order. For example, throughout all developmental stages, the top 3 stable expression genes were: GAPDH, B2M and 18S for geNorm; GAPDH, 18S and B2M for Bestkeeper; and 18S, GAPDH and UBCE for NormFinder. This deviation is natural because of the different algorithms used. Both BestKeeper and geNorm use a pair-wise comparison approach, and are highly dependent on the assumption that none of the genes being analyzed are co-regulated [36]. On the other hand, in NormFinder, a separate analysis of the sample subgroups and estimation of both intra- and inter-group variation in expression levels are included into the calculation of a gene stability value [33].

In our investigation, GAPDH and B2M, were identified as the most suitable genes in samples containing all eighteen developmental stages, with an M-value of 0.57 (i.e.,  $M < 1$ ); while 18S was the next most stable gene with an M-value of 0.66 (i.e.,  $M < 1$ ). In order to obtain a more accurate view about the stability of reference genes for the different developmental stages, we sub-

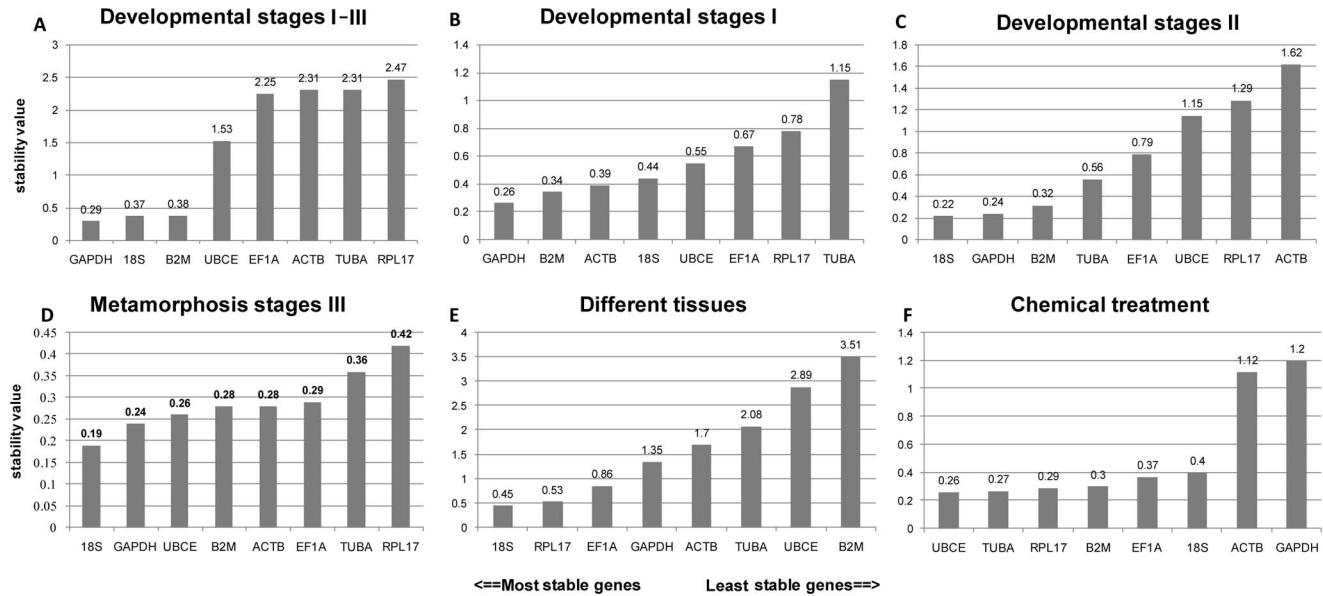

**Figure 4. Expression stability analysis of the 8 candidate reference genes by BestKeeper.** The stability values of the eight candidate genes at: (A) Developmental stages I-III; (B) developmental stage I; (C) developmental stage II; (D) metamorphosis stage III; (E) different tissues; (F) chemical treatment.

doi:10.1371/journal.pone.0091715.g004

divided the original eighteen developmental stages into three groups: termed I, II and III and we showed that the optimum reference genes in each group possessed M-values of less than 0.5 (Figure 3B-D). To ensure that the normalization is as accurate as possible, reference genes with the closest Ct value to that of the

target genes should be selected [20]. Thus, the expression level of each reference gene was also investigated (Table S1).

According to the comprehensive ranking of the Ref-Finder performed, the combination of two reference genes, 18s and GAPDH, were shown to be the most stable genes across all

**Table 2. Expression stability analysis of the 8 candidate reference genes by NormFinder.**

| Rank                 | Stages I-III   | Stage I       | Stage II       | Stage III     | Tissues       | Treatment    |
|----------------------|----------------|---------------|----------------|---------------|---------------|--------------|
| 1                    | UBCE           | 18S           | GAPDH          | GAPDH         | RPL17         | B2M          |
| M value              | 0.778          | 0.193         | 0.196          | 0.059         | 0.240         | 0.039        |
| 2                    | GAPDH          | GAPDH         | EF1A           | 18S           | 18S           | TUBA         |
| M value              | 1.372          | 0.278         | 0.481          | 0.104         | 0.288         | 0.039        |
| 3                    | 18S            | UBCE          | 18S            | B2M           | EF1A          | EF1A         |
| M value              | 1.380          | 0.467         | 0.816          | 0.164         | 0.754         | 0.123        |
| 4                    | TUBA           | EF1A          | B2M            | ACTB          | ACTB          | UBCE         |
| M value              | 1.564          | 0.542         | 0.993          | 0.178         | 1.760         | 0.139        |
| 5                    | B2M            | ACTB          | UBCE           | UBCE          | GAPDH         | 18S          |
| M value              | 1.827          | 0.712         | 1.008          | 0.203         | 1.973         | 0.22         |
| 6                    | EF1A           | RPL17         | TUBA           | TUBA          | TUBA          | RPL17        |
| M value              | 1.964          | 0.792         | 1.034          | 0.255         | 3.193         | 0.269        |
| 7                    | RPL17          | B2M           | RPL17          | RPL17         | UBCE          | GAPDH        |
| M value              | 2.077          | 0.900         | 1.250          | 0.283         | 3.355         | 1.710        |
| 8                    | ACTB           | TUBA          | ACTB           | EF1A          | B2M           | ACTB         |
| M value              | 2.376          | 1.123         | 1.958          | 0.765         | 4.331         | 1.823        |
| the best combination | UBCE/<br>GAPDH | 18S/<br>GAPDH | GAPDH/<br>EF1A | GAPDH/<br>18S | RPL17/<br>18S | B2M/<br>TUBA |
| M value              | 0.632          | 0.154         | 0.203          | 0.038         | 0.264         | 0.039        |

Note: The stability of the eight candidate genes, indicated by the M value were calculated by NormFinder at all developmental stages (i.e., I-III combined); as well as at developmental stage I; stage II; and stage III alone; in different tissues; and following chemical treatment.

doi:10.1371/journal.pone.0091715.t002

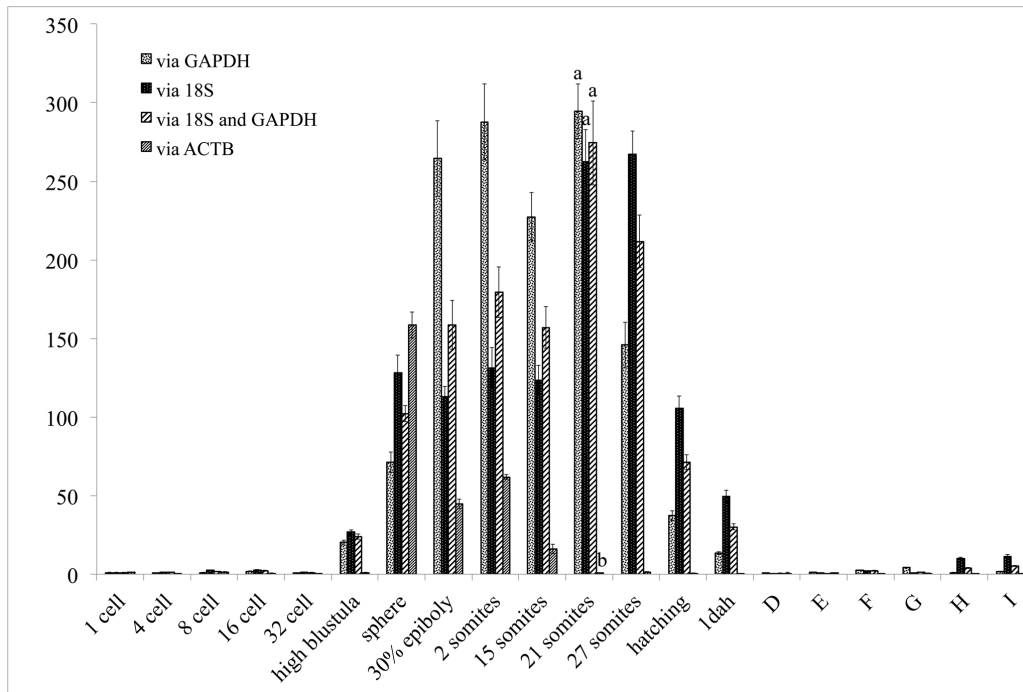

**Figure 5. Quantitative analysis of the LEFTY gene expression in embryos.** The relative expression variance is shown as the ratio between the amount of LEFTY mRNA normalized to the corresponding GAPDH values, 18S value and the geometric average of both values at a particular developmental stage and in unfertilized eggs. Different developmental stages from 1 cell stage to metamorphosis stages. Columns correspond to: 1-cell, 4-cell, 8-cell, and 32-cell stages, high blastula stage, sphere stage, 30% epiboly, as well as the 2-somite, 15-somite, 21-somite, and 27-somite stage, during hatching, in 1-day old larva, and during metamorphosis stages D~I. doi:10.1371/journal.pone.0091715.g005

developmental stages and tissue types in the half-smooth tongue sole. This is consistent with the results reported in the Atlantic salmon [37] and Japanese flounder [12]. In addition, tissue-dependent variations have been observed in the expression of most housekeeping genes in flatfish. In our study, 18S and RPL17 were shown to be the most stable reference genes. ACTB has been used previously for half-smooth tongue sole organs [38–40], but it was proved to be an unstable reference gene in our investigation because of significant difference between ACTB and the combination of GAPDH and 18S, even either of 18S or GAPDH. ACTB was ranked at the worst reference gene in tissues group. In contrast, ACTB/UBCE were shown to be the best reference genes in different organs of the Japanese flounder [10], and EF1A and RPSD were identified for Atlantic halibut [36] and turbot [41] tissue.

The expression stage of LEFTY was detected by *in situ* hybridization from shield-stage to the 27-somite stage in the Japanese flounder [42]. We demonstrated that LEFTY appeared earlier (at high blastula, i.e., 1k-cell stage) in the half smooth tongue sole, and up to 1dpf by qRT-PCR, which is a more sensitive assay than *in situ* hybridization. In zebrafish, there are two LEFTY genes (LEFTY1 and LEFTY2). Most reports describe the expression of LEFTY1 occurring from prior to gastrulation (from sphere stage in the blastula period) [43], to the 25- or 26-somite stage in the segmentation period [44–49] although there is no evidence showing the expression of either LEFTY1 or LEFTY2 after this stage. However, our evidence indicates that in the half smooth tongue sole, the expression of LEFTY appears earlier and disappears later (i.e., it is expressed over a wider range of developmental stages), when compared with either the zebrafish or the Japanese flounder.

We believe that this is the first work to assess valid reference genes for qRT-PCR studies in the half-smooth tongue sole. This work is important for future developmental gene expression studies in this commercially important species as it provides valuable tools for investigating gene expression in both the embryonic and larval stages, as well as in different tissues and following chemical treatment in this flatfish species, which currently suffers from a high mortality risk during larval production.

## Supporting Information

**Figure S1 The transcriptional levels (Ct value) of 8 candidate reference genes (18S, TUBA, B2M, ACTB, EF1A, GAPDH, RPL17 and UBCE).** Presented as mean Ct value (cycle threshold value) for each candidate gene and each sample of different developmental stages, tissues and chemical treatment. For developmental stages I and II, 30 embryos were used per stage, while for developmental stage III, three larvae were used. Tissue samples were collected from three different adult fish. Experiments were performed in triplicate. (A) Embryonic developmental stages (I and II), include the 1-cell, 4-cell, 8-cell, 16-cell, 32-cell, high-, and sphere-stages, 30% epiboly, and 2-somite, 15-somite, 21-somite, and 27-somite stages; (B) Metamorphosis stages (III), includes metamorphosis stages D, E, F, G, H, I; (C) Different tissues include muscle, kidney, gill, spleen, liver, intestines, egg and sperm; (D) Embryos at the 16-cell stage were treated with SB431542 at 100  $\mu$ M or 200  $\mu$ M, or with DMSO or double distilled water as controls. (TIF)

**Table S1 Groups divided according to abundance of expression of eight candidate genes.**



(DOC)

**Table S2 Descriptive statistics of 8 candidate reference genes expression based on the BestKeeper approach.**

(DOC)

**Acknowledgments**

We thank Laizhou Mingbo Aquatic CO., LTD, especially Mr. Wenhui Ma and Xiaomei Wang, for kindly providing the half-smooth tongue sole

**References**

- Bustin SA, Benes V, Nolan T, Pfaffl MW (2005) Quantitative real-time RT-PCR—a perspective. *J Mol Endocrinol* 34: 597–601.
- Huggett J, Dheda K, Bustin S, Zumla A (2005) Real-time RT-PCR normalisation; strategies and considerations. *Genes Immun* 6: 279–284.
- Suzuki T, Kobayashi K, Sasaki O (2000) Real-time displacement measurement with a two-wavelength sinusoidal phase-modulating laser diode interferometer. *Appl Opt* 39: 2646–2652.
- Vandesompele J, De Preter K, Pattyn F, Poppe B, Van Roy N, et al. (2002) Accurate normalization of real-time quantitative RT-PCR data by geometric averaging of multiple internal control genes. *Genome Biol* 3: RESEARCH0034.
- Okada N, Takagi Y, Seikai T, Tanaka M, Tagawa M (2001) Asymmetrical development of bones and soft tissues during eye migration of metamorphosing Japanese flounder, *Paralichthys olivaceus*. *Cell Tissue Res* 304: 59–66.
- Concha ML, Burdine RD, Russell C, Schier AF, Wilson SW (2000) A nodal signaling pathway regulates the laterality of neuroanatomical asymmetries in the zebrafish forebrain. *Neuron* 28: 399–409.
- Hashimoto H, Mizuta A, Okada N, Suzuki T, Tagawa M, et al. (2002) Isolation and characterization of a Japanese flounder clonal line, reversed, which exhibits reversal of metamorphic left-right asymmetry. *Mech Dev* 111: 17–24.
- Capdevila J, Vogtanl KJ, Tabin CJ, Izpisua Belmonte JC (2000) Mechanisms of left-right determination in vertebrates. *Cell* 101: 9–21.
- Suzuki T, Washio Y, Aritaki M, Fujinami Y, Shimizu D, et al. (2009) Metamorphic pitx2 expression in the left habenula correlated with lateralization of eye-sidedness in flounder. *Dev Growth Differ* 51: 797–808.
- Zheng WJ, Sun L (2011) Evaluation of housekeeping genes as references for quantitative real time RT-PCR analysis of gene expression in Japanese flounder (*Paralichthys olivaceus*). *Fish Shellfish Immunol* 30: 638–645.
- Fernandes JMO, Mommens M, Hagen O, Babiak I, Solberg C (2008) Selection of suitable reference genes for real-time PCR studies of Atlantic halibut development. *Comparative Biochemistry and Physiology Part B: Biochemistry and Molecular Biology* 150: 23–32.
- Zhong Q, Zhang Q, Wang Z, Qi J, Chen Y, et al. (2008) Expression Profiling and Validation of Potential Reference Genes During *Paralichthys olivaceus* Embryogenesis. *Marine Biotechnology* 10: 310–318.
- Evrard E, Devaux A, Bony S, Burgeot T, Riso R, et al. (2010) Responses of the European flounder *Platichthys flesus* to the chemical stress in estuaries: load of contaminants, gene expression, cellular impact and growth rate. *Biomarkers* 15: 111–127.
- Minami T (1982) The early life history of flounder *Paralichthys olivaceus*. *Bulletin of the Japanese Society of Scientific Fisheries* 48: 1581–1588.
- Chen D, Pan X, Xiao P, Farwell MA, Zhang B (2011) Evaluation and identification of reliable reference genes for pharmacogenomics, toxicogenomics, and small RNA expression analysis. *J Cell Physiol* 226: 2469–2477.
- Hellemsans J, Mortier G, De Paepe A, Speleman F, Vandesompele J (2007) qBase relative quantification framework and software for management and automated analysis of real-time quantitative PCR data. *Genome Biol* 8: R19.
- Cechi K, Gelinis Y, Mathieu P, Deshaies Y, Richard D (2012) Validation of reference genes for the relative quantification of gene expression in human epicardial adipose tissue. *PLoS One* 7: e32265.
- Andersen CL, Jensen JL, Orntoft TF (2004) Normalization of real-time quantitative reverse transcription-PCR data: a model-based variance estimation approach to identify genes suited for normalization, applied to bladder and colon cancer data sets. *Cancer Res* 64: 5245–5250.
- Ye X, Zhang L, Dong H, Tian Y, Lao H, et al. (2010) Validation of reference genes of grass carp *Ctenopharyngodon idellus* for the normalization of quantitative real-time PCR. *Biotechnol Lett* 32: 1031–1038.
- Small BC, Murdock CA, Bilodeau-Bourgeois AL, Peterson BC, Waldbieser GC (2008) Stability of reference genes for real-time PCR analyses in channel catfish (*Ictalurus punctatus*) tissues under varying physiological conditions. *Comp Biochem Physiol B Biochem Mol Biol* 151: 296–304.
- Lland H, Hertzberg M, Marlton P (2006) Myeloid leukaemia Methods and Protocols, Humana, Totowa, NJ.
- Olsvik PA, Softefand L, Lie KK (2008) Selection of reference genes for qRT-PCR examination of wild populations of Atlantic cod *Gadus morhua*. *BMC Res Notes* 1: 47.
- Jorgensen SM, Kleveland EJ, Grimholt U, Gjoen T (2006) Validation of reference genes for real-time polymerase chain reaction studies in Atlantic salmon. *Mar Biotechnol (NY)* 8: 398–408.
- Pena AA, Bols NC, Marshall SH (2010) An evaluation of potential reference genes for stability of expression in two salmonid cell lines after infection with either *Piscirickettsia salmonis* or IPNV. *BMC Res Notes* 3: 101.
- Crisafi F, Denaro R, Genovese M, Cappello S, Mancuso M, et al. (2011) Comparison of 16SrDNA and toxR genes as targets for detection of *Vibrio anguillarum* in *Dicentrarchus labrax* kidney and liver. *Res Microbiol* 162: 223–230.
- Aursnes IA, Rishovd AL, Karlsen HE, Gjoen T (2011) Validation of reference genes for quantitative RT-qPCR studies of gene expression in Atlantic cod (*Gadus morhua* L.) during temperature stress. *BMC Res Notes* 4: 104.
- Nagae M, Kawasaki F, Tanaka Y, Ohkubo N, Matsubara T, et al. (2007) Detection and assessment of androgenic potency of endocrine-disrupting chemicals using three-spined stickleback, *Gasterosteus aculeatus*. *Environ Sci* 14: 255–261.
- Olsvik PA, Lie KK, Saele O, Sanden M (2007) Spatial transcription of CYP1A in fish liver. *BMC Physiol* 7: 12.
- Bower NI, Johnston IA (2009) Selection of reference genes for expression studies with fish myogenic cell cultures. *BMC Mol Biol* 10: 80.
- Xiao X, Li M, Wang K, Qin Q, Chen X (2011) Characterization of large yellow croaker (*Pseudosciaena crocea*) beta-actin promoter supports beta-actin gene as an internal control for gene expression modulation and its potential application in transgenic studies in fish. *Fish Shellfish Immunol* 30: 1072–1079.
- Aroua S, Weltzien FA, Le Belle N, Dufour S (2007) Development of real-time RT-PCR assays for eel gonadotropins and their application to the comparison of in vivo and in vitro effects of sex steroids. *Gen Comp Endocrinol* 153: 333–343.
- Ingerslev HC, Pettersen EF, Jakobsen RA, Petersen CB, Wergeland HI (2006) Expression profiling and validation of reference gene candidates in immune relevant tissues and cells from Atlantic salmon (*Salmo salar* L.). *Mol Immunol* 43: 1194–1201.
- Fernandes JM, Mommens M, Hagen O, Babiak I, Solberg C (2008) Selection of suitable reference genes for real-time PCR studies of Atlantic halibut development. *Comp Biochem Physiol B Biochem Mol Biol* 150: 23–32.
- Zhou RX, Meng T, Meng HB, Cheng DX, Bin SY, et al. (2010) Selection of Reference Genes in Transcription Analysis of Gene Expression of the Mandarin Fish, *Siniperca chuatsi*. *Dongwuxue Yanjiu* 31: 141–146.
- Tang R, Dodd A, Lai D, McNabb WC, Love DR (2007) Validation of Zebrafish (*Danio rerio*) Reference Genes for Quantitative Real-time RT-PCR Normalization. *Acta Biochimica et Biophysica Sinica* 39: 384–390.
- Overgard AC, Nerland AH, Patel S (2010) Evaluation of potential reference genes for real time RT-PCR studies in Atlantic halibut (*Hippoglossus Hippoglossus* L.); during development, in tissues of healthy and NNV-injected fish, and in anterior kidney leucocytes. *BMC Mol Biol* 11: 36.
- Kortner TM, Valen EC, Kortner H, Marjara IS, Krogdahl Å, et al. (2011) Candidate reference genes for quantitative real-time PCR (qPCR) assays during development of a diet-related enteropathy in Atlantic salmon (*Salmo salar* L.) and the potential pitfalls of uncritical use of normalization software tools. *Aquaculture* 318: 355–363.
- Ma Q, Liu SF, Zhuang ZM, Sun ZZ, Liu CL, et al. (2011) Molecular cloning, expression analysis of insulin-like growth factor I (IGF-I) gene and IGF-I serum concentration in female and male Tongue sole (*Cynoglossus semilaevis*). *Comp Biochem Physiol B Biochem Mol Biol* 160: 208–214.
- Ma Q, Liu SF, Zhuang ZM, Sun ZZ, Liu CL, et al. (2012) The co-existence of two growth hormone receptors and their differential expression profiles between female and male tongue sole (*Cynoglossus semilaevis*). *Gene* 511: 341–352.
- Ji XS, Liu HW, Chen SL, Jiang YL, Tian YS (2011) Growth differences and dimorphic expression of growth hormone (GH) in female and male *Cynoglossus semilaevis* after male sexual maturation. *Mar Genomics* 4: 9–16.
- Dang W, Sun L (2011) Determination of internal controls for quantitative real time RT-PCR analysis of the effect of *Edwardsiella tarda* infection on gene expression in turbot (*Scophthalmus maximus*). *Fish Shellfish Immunol* 30: 720–728.
- Hashimoto H, Aritaki M, Uozumi K, Uji S, Kurokawa T, et al. (2007) Embryogenesis and expression profiles of charon and nodal-pathway genes in sinistral (*Paralichthys olivaceus*) and dextral (*Verasper variegatus*) flounders. *Zool Sci* 24: 137–146.
- Mazmanian G, Kovshilovsky M, Yen D, Mohanty A, Mohanty S, et al. (2010) The zebrafish *dyrklb* gene is important for endoderm formation. *Genesis* 48: 20–30.

samples. We appreciate the help of Dr. Sarah E Webb, The Hong Kong University of Science & Technology (HKUST), for helpful comments on this manuscript.

**Author Contributions**

Conceived and designed the experiments: JQ CL QZ. Performed the experiments: CL NX YZ JZ. Analyzed the data: CL LJ. Contributed reagents/materials/analysis tools: JQ QZ. Wrote the paper: CL NX JQ.

44. Zhou W, Dai J, Attanasio M, Hildebrandt F (2010) Nephrocystin-3 is required for ciliary function in zebrafish embryos. *Am J Physiol Renal Physiol* 299: F55–62.
45. Wloga D, Webster DM, Rogowski K, Bre MH, Levilliers N, et al. (2009) TLL3 Is a tubulin glycine ligase that regulates the assembly of cilia. *Dev Cell* 16: 867–876.
46. Schneider I, Schneider PN, Derry SW, Lin S, Barton LJ, et al. (2010) Zebrafish Nkd1 promotes Dvl degradation and is required for left-right patterning. *Dev Biol* 348: 22–33.
47. Lin X, Xu X (2009) Distinct functions of Wnt/beta-catenin signaling in KV development and cardiac asymmetry. *Development* 136: 207–217.
48. Francescato L, Rothschild SC, Myers AL, Tombes RM (2010) The activation of membrane targeted CaMK-II in the zebrafish Kupffer's vesicle is required for left-right asymmetry. *Development* 137: 2753–2762.
49. Aamar E, Dawid IB (2010) Sox17 and chordin are required for formation of Kupffer's vesicle and left-right asymmetry determination in zebrafish. *Dev Dyn* 239: 2980–2988.
